# Supplementary material for: A honeycomb carbon substrate anchored with Sn and Sb bimetallic atoms boosts oxygen-reduction electrocatalysis
Source: Royal Society of Chemistry journal article supplement (doi:10.1039/d3qi00502j), 2023-01-01
Supplement: d3qi00502j1.pdf [file d3qi00502j1.pdf]

## Supporting Information

### **Honeycomb carbon substrate anchored with Sn and Sb bimetallic atoms boosts oxygen reduction electrocatalysis**

Shuting Li,<sup>a</sup> Jinxi Han,<sup>a</sup> Yuyu Guo,<sup>a</sup> Zhengqiang Xia,<sup>a</sup> Sanping Chen,<sup>a\*</sup> Gang Xie,<sup>a</sup> Shengli Gao,<sup>a</sup> Qi Yang<sup>a\*</sup>

<sup>a</sup> *Key Laboratory of Synthetic and Natural Functional Molecule of the Ministry of Education, College of Chemistry and Materials Science, Northwest University, Xi'an, Shaanxi, 710127, China.*

*\*Corresponding authors e-mail address: yangqi@nwu.edu.cn, sanpingchen@126.com*

## Material characterization

The morphology details were observed by scanning electron microscopy (SEM, Apreo S) and transmission electron microscopy (TEM, Talos F200x, JEM-1400Flash) with energy dispersive X-ray spectrometer. The phase composition and structure of all samples were obtained on X-ray diffraction (XRD, D8 Advance). The chemical composition and valence were detected by X-ray photoelectron spectroscopy (XPS, PHI-5000 Versa ProbeIII). The Raman spectra recorded on a Micro-Raman imaging spectrometer (Raman, DXR2). The specific surface area was tested and calculated using Brunauer-Emmett-Teller (BET, Tristar II 3020) method, samples were vacuum degassed at 150 °C for 6 hours.

## Electrochemical measurements

The performance of the ORR was tested using a CS2350H electrochemical workstation. The classical three-electrode test method was used, with Ag/AgCl chloride as the reference electrode, the Pt electrode with a salt bridge as the counter electrode, and a rotary ring disk electrode with glass carbon (GC) as the working electrode. The SnSb-NC catalyst (5.0 mg) was dispersed in a solution of ethanol (400.0  $\mu$ l), deionized water (90.0  $\mu$ l) and Nafion 117 (10.0  $\mu$ l), and the homogenized ink was obtained by ultrasonic detection for 30 minutes. Then, 12.0  $\mu$ l of ink was dropped on the GC carefully and naturally air-dried as the working electrode. The electrolyte was placed in N<sub>2</sub>/O<sub>2</sub> saturation before electrochemical testing. Cyclic voltammetry (CV) at a scan rate of 20 mV s<sup>-1</sup> and linear scanning voltammetry (LSV) at different scan speeds (400 rpm-2500 rpm) were performed. All the test data obtained in this paper should be converted into a reversible hydrogen electrode (RHE) with the conversion formula  $E_{\text{RHE}} = E_{\text{Ag/AgCl}} + 0.059 \text{ pH} + 0.197$ .

Using disk current and ring current, the following equations were used to calculate hydrogen peroxide production (H<sub>2</sub>O<sub>2</sub> %) and electron transfer number (n):

$$H_2O_2 (\%) = \frac{200 * \frac{I_r}{N}}{I_d + \frac{I_r}{N}}$$

$$n = \frac{4 * I_d}{I_d + \frac{I_r}{N}}$$

Where  $I_r$  is the ring current,  $I_d$  is the disk current, and  $N$  is the ring-disk electrode with a collection coefficient of 0.47.

### **Assembly and test of zinc-air battery**

Mix the catalyst (9.0 mg), PVDF (1.0 mg), and anhydrous sodium sulfate (1.0 mg) thoroughly. Subsequently, add 3 to 4 drops of 1-methyl-2-pyrrolidenone to the mixture and grind for 30 minutes until thickened. The catalyst slurry was evenly coated on the surface of the type P1 composite electrode after drying at 100 °C under static press pressure of 15 MPa for 30 minutes, as the cathode for the battery, the polished zinc sheet as the anode, and 6 M KOH + 0.2 M  $Zn(Ac)_2 \cdot 2H_2O$  as the electrolyte. Open-circuit voltage (OCV) and power density were tested by the CS2350H Electrochemical Workstation. Specific capacity and constant current charge and discharge were passed by Blue Electric Test System test (5V1A8C).

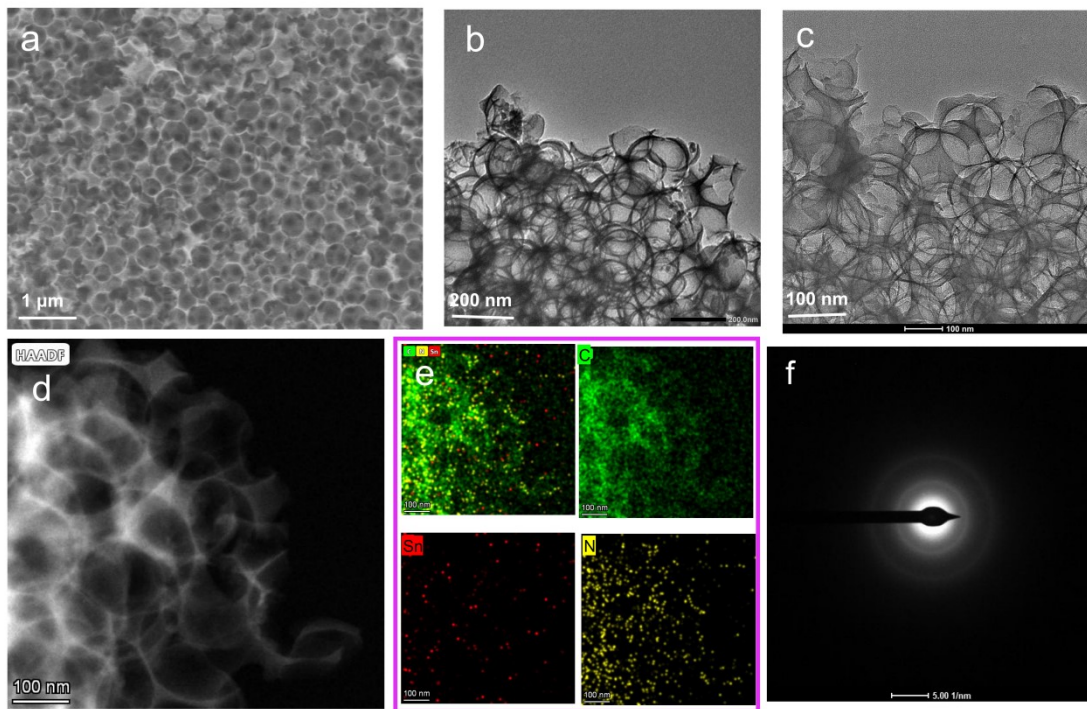

**Figure S1.** (a) SEM image of Sn-NC. (b-c) TEM images of Sn-NC. (d) HAADF-STEM image of Sn-NC. (e) Elemental mapping images of Sn-NC. (f) SAED pattern of Sn-NC.

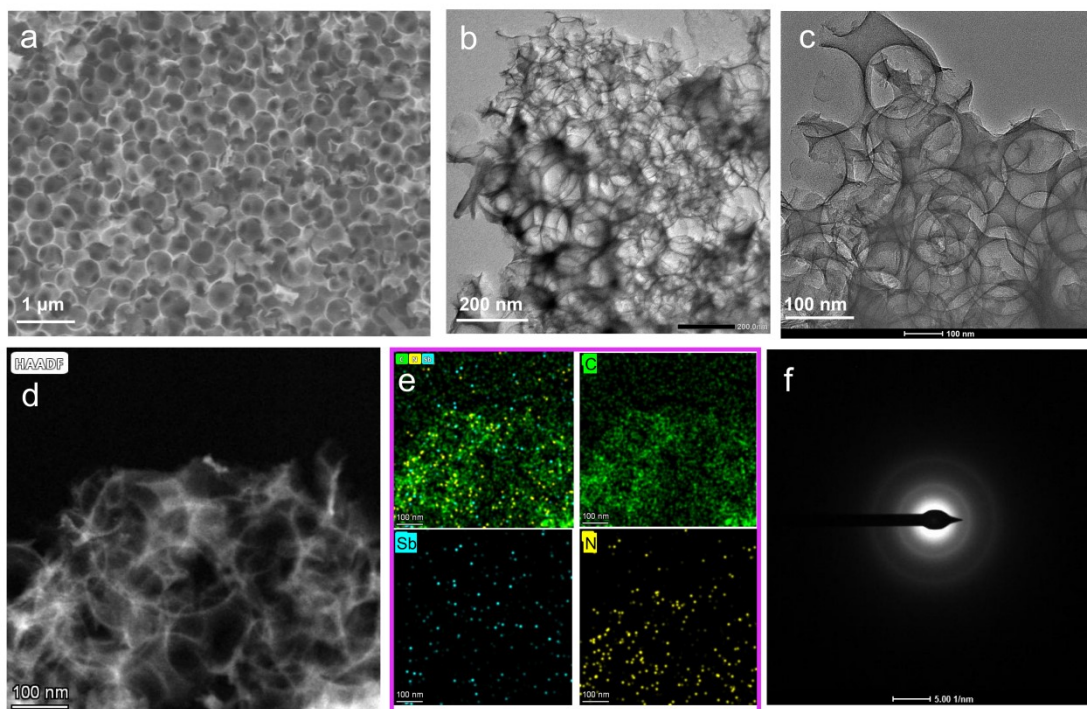

**Figure S2.** (a) SEM image of Sb-NC. (b-c) TEM images of Sb-NC. (d) HAADF-STEM image of Sb-NC. (e) Elemental mapping images of Sb-NC. (f) SAED pattern of Sb-NC.

The electron diffraction test of Sn-NC and Sb-NC showed that the carbon material had no stereotyped carbon.

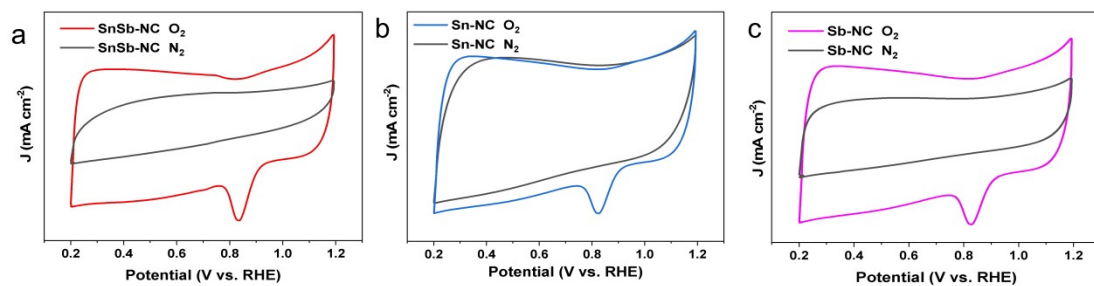

**Figure S3.** Cyclic voltammogram of the catalysts in 0.1 M KOH solution at O<sub>2</sub> and N<sub>2</sub> saturation.

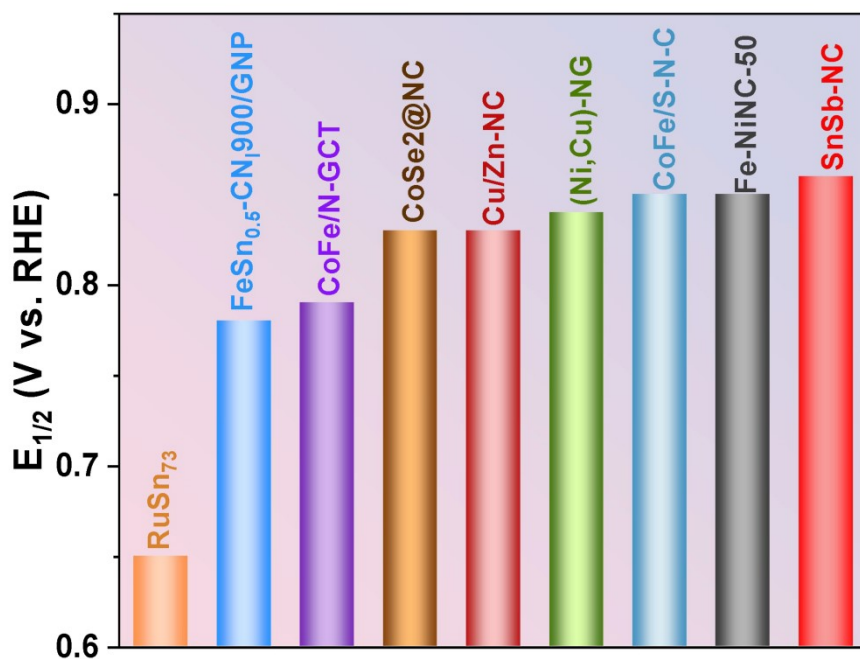

**Figure S4.** Comparison of the  $E_{1/2}$  with recently reported catalysts.<sup>1-8</sup>

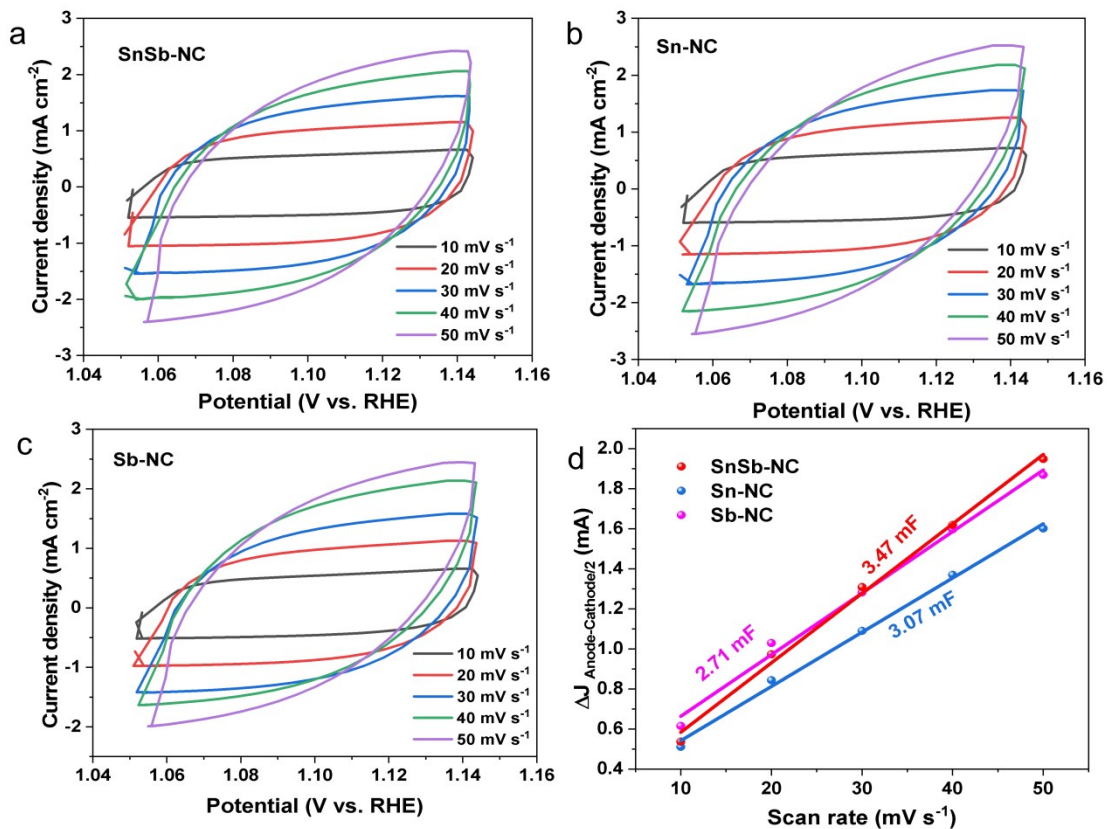

**Figure S5.** (a-c) electric double layer capacitance of catalysts. (d) CV fitting plots for different catalysts measured at non-Faradic regions.

**Table S1.** Atomic percentages of N were obtained by the deconvolutions of N 1s spectra.

| Catalysts | N content (at. %) |            |            |            |
|-----------|-------------------|------------|------------|------------|
|           | Pyridinic N       | Pyrrolic N | Graphite N | Oxidized N |
| SnSb-NC   | 15.81             | 7.82       | 60.22      | 16.15      |
| Sn-NC     | 14.63             | 15.92      | 54.83      | 14.62      |
| Sb-NC     | 13.14             | 8.37       | 53.14      | 25.35      |

**Table S2.** The stability of carbon-based Zn-air batteries has recently been reported.

| Catalysts                                     | Durability (h) | Reference |
|-----------------------------------------------|----------------|-----------|
| SnSb-NC                                       | 1106           | This work |
| (Ni, Cu)-NG                                   | 110            | 7         |
| Fe Co-WC/NC                                   | 200            | 9         |
| Co <sub>9</sub> S <sub>8</sub> @Co/Mn-S, N-PC | 210            | 10        |
| Co/CeO <sub>2</sub> -NCNA@CC                  | 380            | 11        |
| Fe/Ni@NPC-SiO <sub>2</sub> /Zn                | 600            | 12        |
| FeCo( $\alpha$ )-ACM                          | 900            | 13        |

※ The actual stable time of the SnSb-NC-based Zn-air battery should be more than 1106 hours due to the three power outages encountered during the test.



## References

- [1] K. Ding, J. Hu, J. Luo, W. Jin, L. Zhao, L. Zheng, W. Yan, B. Weng, H. Hou and X. Ji, Confined N-CoSe<sub>2</sub> active sites boost bifunctional oxygen electrocatalysis for rechargeable Zn–air batteries, *Nano Energy*, 2022, **91**, 106675.
- [2] Li, Y. Tang, T. Fu, Y. Xiang, Z. Xiong, Y. Si, C. Guo and Z. Jiang, S, N co-doped carbon nanotubes coupled with CoFe nanoparticles as an efficient bifunctional ORR/OER electrocatalyst for rechargeable Zn-air batteries, *Chem. Eng. J.*, 2022, **429**, 132174.
- [3] X. Liu, L. Wang, P. Yu, C. Tian, F. Sun, J. Ma, W. Li and H. Fu, A Stable Bifunctional Catalyst for Rechargeable Zinc-Air Batteries: Iron-Cobalt Nanoparticles Embedded in a Nitrogen-Doped 3D Carbon Matrix, *Angew. Chem. Int. Ed.*, 2018, **57**, 16166-16170.
- [4] Z. Y. Lu, B. Wang, Y. F. Hu, W. Liu, Y. Zhao, R. Yang, Z. Li, J. Luo, B. Chi, Z. Jiang, M. Li, S. Mu, S. Liao, J. Zhang and X. Sun, An Isolated Zinc-Cobalt Atomic Pair for Highly Active and Durable Oxygen Reduction, *Angew. Chem. Int. Ed.*, 2019, **58**, 2622-2626.
- [5] E. Negro, A. Delpeuch, K. Vezzu, G. Nawn, F. Bertasi, A. Ansaldo, V. Pellegrini, B. Dembinska, S. Zoladek, K. Miecznikowski, I.A. Rutkowska, M. Skunik-Nuckowska, P.J. Kulesza, F. Bonaccorso and V. Di Noto, Toward Pt-Free Anion-Exchange Membrane Fuel Cells: Fe-Sn Carbon Nitride-Graphene Core-Shell Electrocatalysts for the Oxygen Reduction Reaction, *Chem. Mater.*, 2018, **30**, 2651-2659.
- [6] Y. Ting and H. Chi, Designing Binary Ru-Sn Oxides with Optimized Performances for the Air Electrode of Rechargeable Zinc-Air Batteries, *ACS Appl. Mater. Inter.*, 2018, **10**, 10064-10075.
- [7] Y. Cheng, H. Wu, J. Han, S. Zhong, S. Huang, S. Chu, S. Song, K. Reddy, X. Wang, S. Wu, X. Zhuang, I. Johnson, P. Liu and M. Chen, Atomic Ni and Cu co-anchored 3D nanoporous graphene as an efficient oxygen reduction electrocatalyst for zinc-air batteries, *Nanoscale*, 2021, **13**, 10862-10870.
- [8] X. Zhu, D. Zhang, C. Chen, Q. Zhang, R. Liu, Z. Xia, L. Dai, R. Amal and X. Lu, Harnessing the interplay of Fe-Ni atom pairs embedded in nitrogen-doped carbon for bifunctional oxygen electrocatalysis, *Nano Energy*, 2020, **71**, 104597.
- [9] L. Xu, S. Wu, D. Deng, C. Wang, J. Qian, G. Lu and H. Li, Fabricating highly active and stable tungsten carbide electrocatalyst for rechargeable zinc-air batteries: An approach of dual metal Co-adjusted the electronic structure, *J. Alloys Compd.*, 2021, **868**, 159236.
- [10] S. Rui, Z. Lu, F. Jiu, F. Ke and W. Ai, In situ produced Co<sub>9</sub>S<sub>8</sub> nanoclusters/Co/Mn-S, N multi-doped 3D porous carbon derived from eriochrome black T as an effective bifunctional oxygen electrocatalyst for rechargeable Zn-air batteries, *J. Colloid Interf. Sci.*, 2022, **608**, 2100-2110.
- [11] S. Li, H. Zhang, L. Wu, H. Zhao, L. Li, C. Sun and B. An, Vacancy-engineered CeO<sub>2</sub>/Co

heterostructure anchored on the nitrogen-doped porous carbon nanosheet arrays vertically grown on carbon cloth as an integrated cathode for the oxygen reduction reaction of rechargeable Zn-air battery, *J. Mater. Chem. A*, 2022, **10**, 9858-9868.

- [12] B. R. Guo, J. N. Guo, W. L. Yang, X. Y. Tian, X. Wang, Z. H. Xiang and M. Wu, Highly dispersed iron/nickel dual-sites in hierarchical porous carbon materials as high-performance bifunctional oxygen electrocatalysts for Zn-air batteries, *Renewable Energ*, 2022, **201**, 117-124.
- [13] C. Chen, D. Cheng, S. Liu, Z. Wang, M. Hu and K. Zhou, Engineering the multiscale structure of bifunctional oxygen electrocatalyst for highly efficient and ultrastable zinc-air battery, *Energy Storage Mater.*, 2020, **24**, 402-411.
